# Supplementary material for: Carbonic anhydrase mimics for enhanced CO2 absorption in an amine-based capture solvent
Source: Royal Society of Chemistry journal article supplement (doi:10.1039/c5dt02943k), 2015-11-26
Supplement: c5dt02943k1.pdf [file c5dt02943k1.pdf]

Supporting Information for:

**Carbonic Anhydrase Mimics for Enhanced CO<sub>2</sub> Absorption in an Amine-Based Capture Solvent**

Rachael A. Burrows,<sup>[b]</sup> David A. Miller,<sup>[b]</sup> Sean R. Parkin,<sup>[b]</sup> Kun Liu,<sup>[a]</sup> Joe E. Remias,<sup>[a]</sup> Yue Yang,<sup>[d]</sup> Felice C. Lightstone,<sup>[d]</sup> Kunlei Liu,<sup>[a,c]</sup> Cameron A. Lippert,<sup>[a]\*</sup> and Susan A. Odom,<sup>[b]\*</sup>

<sup>a</sup>*University of Kentucky, Center for Applied Energy Research, Lexington, KY 40511-8410*

<sup>b</sup>*Department of Chemistry, University of Kentucky, Lexington, KY 40506-0055*

<sup>c</sup>*Department of Mechanical Engineering, University of Kentucky, Lexington, KY 40506-0055*

<sup>d</sup>*Biosciences and Biotechnology Division, Lawrence Livermore National Laboratory, Livermore, CA, 94550-9234*

E-mail: Cameron.lippert@uky.edu; kunlei.liu@uky.edu

**Table of Contents**

|                    |     |
|--------------------|-----|
| Figure S1.         | S1  |
| Figure S2          | S1  |
| Figure S3          | S2  |
| Figure S4          | S2  |
| Table S1           | S2  |
| Figure S5          | S4  |
| Figure S6          | S5  |
| Figure S7          | S5  |
| Atomic Coordinates | S6  |
| References         | S13 |

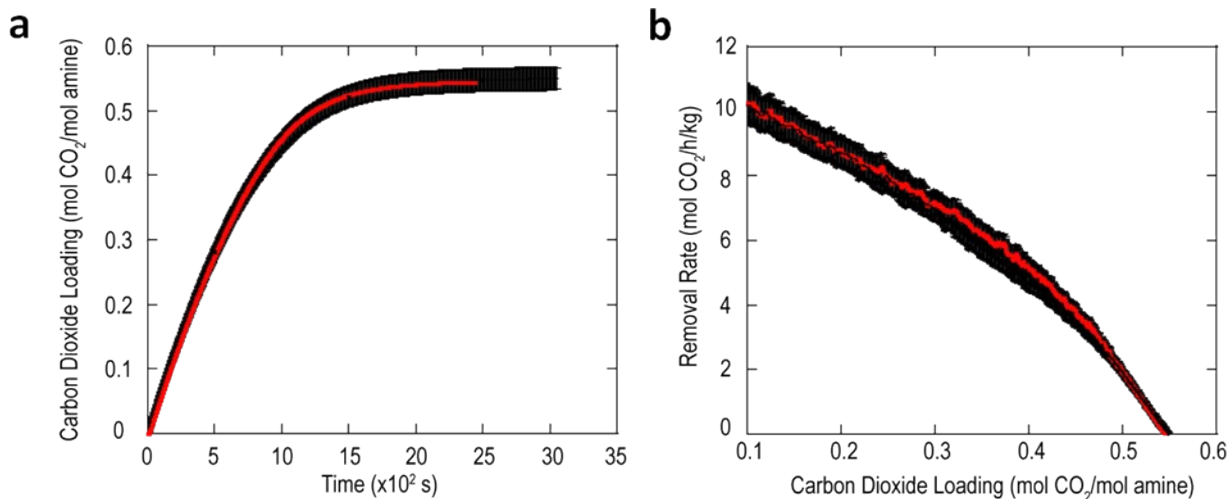

**Figure S1.** Breakthrough data of 30 wt% MEA with standard error of 5% (black) and 30 wt% MEA with 2.3 g/L carbonic anhydrase (red) for (a) increase in carbon loading versus time, and (b) removal rate as a function of carbon loading.

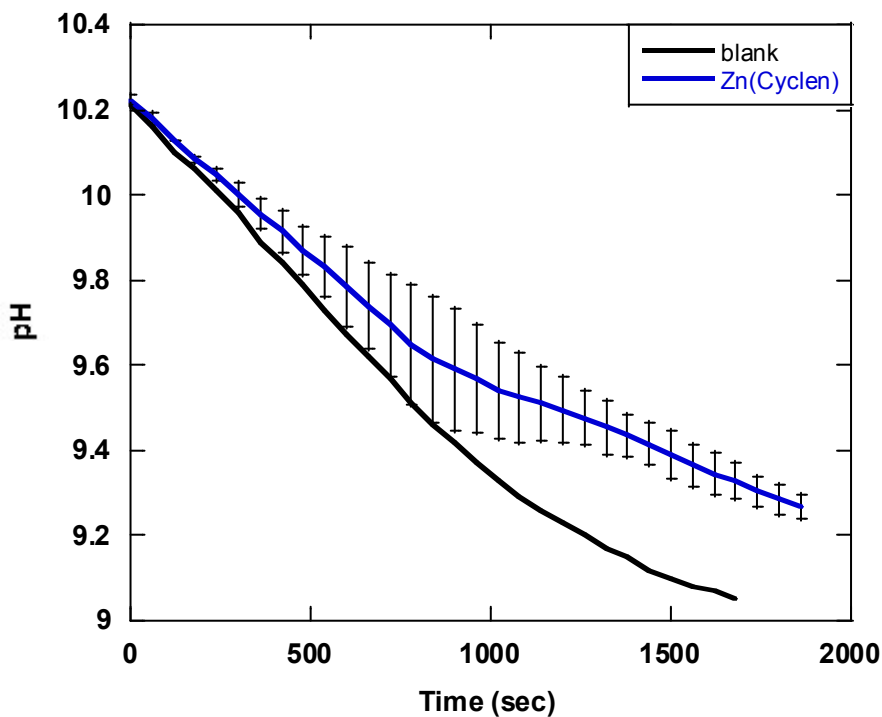

**Figure S2.** CO<sub>2</sub> absorption studies of 30 wt% MEA (black line) and Zn-cyclen in 30 wt% MEA (blue line).

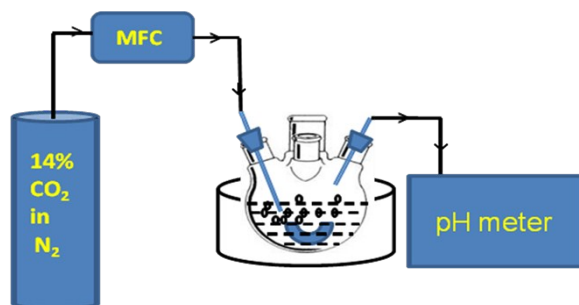

**Figure S3.** Schematic representation of the delta-pH testing method apparatus.

$$\sqrt{\frac{D_{CO_2} \cdot k_2 \cdot [amine]}{H_{CO_2}}} \quad (S1)$$

$$k_2[amine] = k_{obs} = k[amine] + k'[cat] \quad (S2)$$

where  $k$  is  $\sim 6000 \text{ M}^{-1}\text{s}^{-1}$  and  $[amine]$  is  $\sim 5 \text{ M}$ ; therefore, with a catalyst loading of  $0.03 \text{ mM}$ ,  $k'$  needs to be  $> 1 \times 10^5 \text{ M}^{-1}\text{s}^{-1}$  in order to contribute to the overall  $k_{obs}$ .

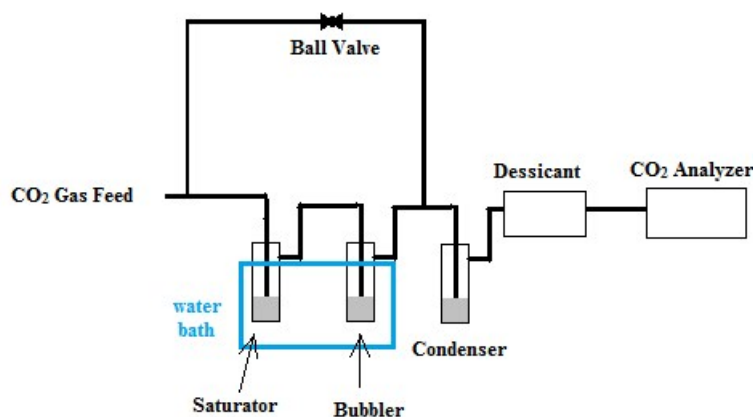

**Figure S4.** Schematic of simple CO<sub>2</sub> bubbling apparatus.

**Table S1.** Important bond lengths (Å), angles and dihedrals (deg).

| Complex 1  |           |                | Complex 2   |           |                |
|------------|-----------|----------------|-------------|-----------|----------------|
| bond/angle | exp value | computed value | bond/angle/ | exp value | computed value |
| Zn1-O5     | 1.984     | 1.956          | Zn1-O1      | 1.978     | 1.956          |
| Zn1-O1     | 2.038     | 2.057          | Zn1-N1      | 2.105     | 2.176          |

|            |        |        |                |        |        |
|------------|--------|--------|----------------|--------|--------|
| Zn1-O2     | 2.044  | 2.048  | Zn1-O2         | 1.966  | 1.955  |
| Zn1-N2     | 2.095  | 2.180  | Zn1-N2         | 2.140  | 2.182  |
| Zn1-N1     | 2.097  | 2.129  | Zn1-N3         | 2.108  | 2.141  |
| Zn2-O2     | 1.960  | 1.954  | N1-C7          | 1.342  | 1.334  |
| Zn2-O3     | 2.001  | 2.009  | N1-C11         | 1.361  | 1.354  |
| Zn2-O4     | 2.008  | 2.100  | N2-C16         | 1.344  | 1.332  |
| Zn2-N3     | 2.026  | 2.080  | N2-C12         | 1.360  | 1.356  |
| Zn2-N4     | 2.045  | 2.056  | O1-C1          | 1.323  | 2.182  |
| Zn3-O1     | 1.967  | 2.009  | O2-C22         | 1.327  | 1.299  |
| Zn3-O3     | 1.998  | 2.054  | O1-Zn1-O2      | 96.99  | 104.28 |
| Zn3-O4     | 2.008  | 2.048  | O1-Zn1-N1      | 86.42  | 85.34  |
| Zn3-Cl     | 2.212  | 2.185  | O2-Zn1-N1      | 155.38 | 157.79 |
| Zn1-O1-Zn3 | 122.35 | 127.37 | O2-Zn1-N2      | 147.59 | 151.71 |
| Zn2-O2-Zn1 | 126.01 | 121.70 | N1-Zn1-N2      | 78.22  | 76.64  |
| Zn3-O3-Zn2 | 93.52  | 92.29  | N2-Zn1-N3      | 109.18 | 102.87 |
| Zn2-O3-Zn3 | 93.15  | 92.45  | C1-C6-C7-N1    | -28.10 | -28.80 |
|            |        |        | N2-C16-C17-C22 | 19.00  | 25.30  |

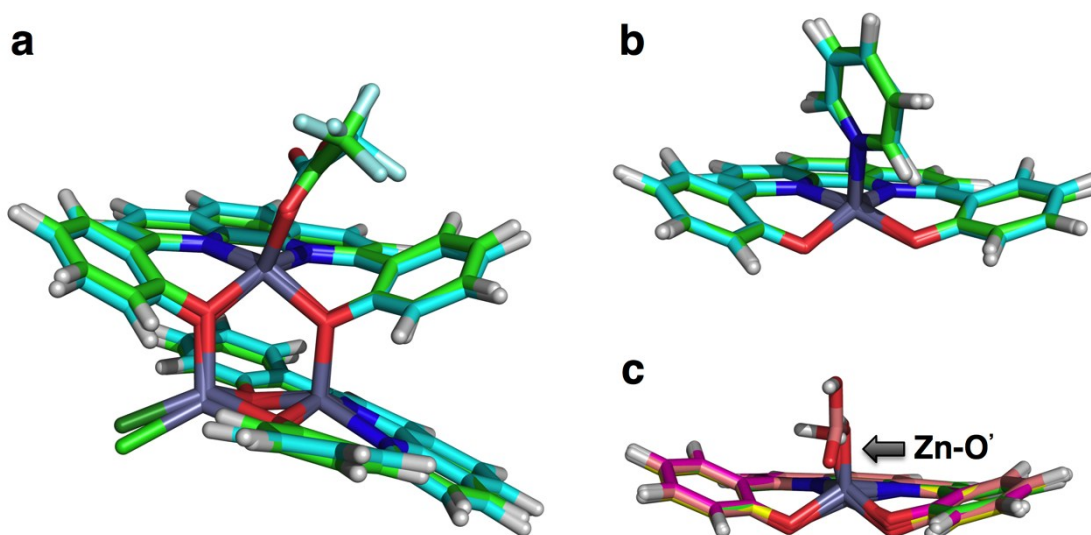

**Figure S5.** Overlay of (a) complex 1 and (b) complex 2 crystal structures (carbon atoms in green) and optimized structures (carbon atoms in cyan). (c) Overlay of complex 2 backbone

(green, from the crystal structure) and its Zn-H<sub>2</sub>O (magenta), Zn-OH<sup>-</sup> (yellow), and Zn-HCO<sub>3</sub><sup>-</sup> (pink) species, with Zn-O' for the latter 3 species labeled.

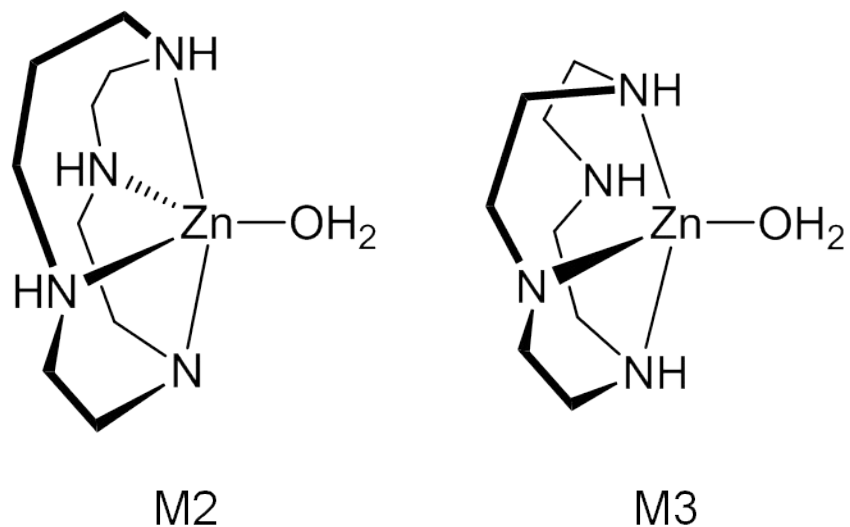

**Figure S6.** Structures of Zinc(Cyclen) complexes M2 and M3.

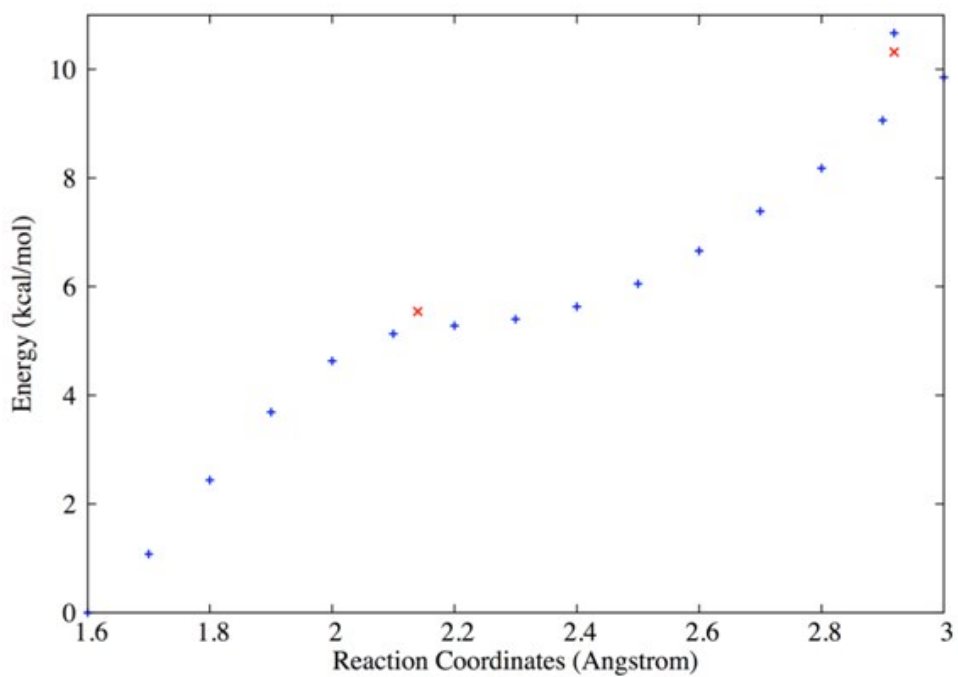

**Figure S7.** Energy profile of CO<sub>2</sub> addition step. CO<sub>2</sub> approaching (blue) is scanned using a series of restraint optimization, while transition state (red) is obtained using restraint-free saddle point optimization with a single imaginary frequency along RC confirmed.

## Atomic Coordinates

### (Optimized) Crystal structure

Energy: -3209.9007745

|    |          |         |          |
|----|----------|---------|----------|
| Zn | 3.88437  | 3.72082 | 15.53830 |
| N  | 1.90568  | 4.40580 | 14.94696 |
| N  | 4.04879  | 3.92750 | 13.37215 |
| O  | 2.99430  | 3.03799 | 17.14065 |
| O  | 5.55158  | 2.70352 | 15.44215 |
| C  | 2.12370  | 3.71882 | 17.81854 |
| C  | 2.14033  | 3.62597 | 19.24363 |
| H  | 2.90075  | 2.96266 | 19.67213 |
| C  | 1.26389  | 4.33108 | 20.03761 |
| H  | 1.32661  | 4.23441 | 21.12949 |
| C  | 0.29605  | 5.17873 | 19.46391 |
| H  | -0.38816 | 5.75776 | 20.09316 |
| C  | 0.22518  | 5.26133 | 18.08822 |
| H  | -0.52175 | 5.92769 | 17.63828 |
| C  | 1.10286  | 4.54664 | 17.23988 |
| C  | 0.88997  | 4.61154 | 15.78760 |
| C  | -0.41081 | 4.88326 | 15.25504 |
| H  | -1.25447 | 4.99528 | 15.94179 |
| C  | -0.60637 | 4.95610 | 13.90315 |
| H  | -1.60524 | 5.15529 | 13.49340 |
| C  | 0.48015  | 4.74530 | 13.01598 |
| C  | 1.71904  | 4.45961 | 13.60669 |
| C  | 2.86979  | 4.19972 | 12.76071 |
| C  | 2.71376  | 4.23812 | 11.36807 |
| C  | 3.86642  | 3.93877 | 10.59923 |
| H  | 3.79369  | 3.91397 | 9.50417  |
| C  | 5.05025  | 3.66162 | 11.22442 |
| H  | 5.92807  | 3.38446 | 10.63519 |
| C  | 5.14583  | 3.68528 | 12.65321 |
| C  | 6.44205  | 3.43719 | 13.30777 |
| C  | 7.62385  | 3.68368 | 12.57081 |
| H  | 7.54404  | 4.13722 | 11.57536 |
| C  | 8.88358  | 3.41924 | 13.07087 |
| H  | 9.77577  | 3.64274 | 12.47530 |
| C  | 8.99277  | 2.86365 | 14.35856 |
| H  | 9.98223  | 2.62944 | 14.77220 |
| C  | 7.86461  | 2.62199 | 15.11225 |
| H  | 7.92664  | 2.19196 | 16.11912 |
| C  | 6.55095  | 2.92187 | 14.64098 |
| C  | 0.35691  | 4.78565 | 11.58632 |
| H  | -0.62393 | 5.01150 | 11.15017 |
| C  | 1.43369  | 4.54069 | 10.79248 |
| H  | 1.34335  | 4.56362 | 9.69950  |
| N  | 4.68830  | 5.57044 | 16.25620 |
| C  | 4.01967  | 6.72993 | 16.24726 |

|   |         |         |          |
|---|---------|---------|----------|
| H | 3.02665 | 6.71212 | 15.77702 |
| C | 4.54038 | 7.89427 | 16.80093 |
| H | 3.95906 | 8.82227 | 16.77191 |
| C | 5.80151 | 7.84377 | 17.39142 |
| H | 6.24137 | 8.74241 | 17.84055 |
| C | 6.49265 | 6.63516 | 17.40647 |
| H | 7.48417 | 6.54879 | 17.86397 |
| C | 5.89991 | 5.51849 | 16.82537 |
| H | 6.38938 | 4.53485 | 16.81018 |

### Zn-H<sub>2</sub>O

Energy: -3038.1465466

|    |          |         |          |
|----|----------|---------|----------|
| Zn | 3.85055  | 3.66437 | 15.45785 |
| N  | 1.89788  | 4.37180 | 14.91258 |
| N  | 4.04415  | 3.90226 | 13.33741 |
| O  | 3.01804  | 3.03768 | 17.11704 |
| O  | 5.60246  | 2.84366 | 15.46822 |
| C  | 2.14241  | 3.71863 | 17.79240 |
| C  | 2.17881  | 3.65484 | 19.21873 |
| H  | 2.94832  | 3.00499 | 19.65181 |
| C  | 1.30278  | 4.36506 | 20.01105 |
| H  | 1.37597  | 4.28619 | 21.10370 |
| C  | 0.32243  | 5.19342 | 19.43352 |
| H  | -0.36551 | 5.77236 | 20.05858 |
| C  | 0.24185  | 5.25869 | 18.05672 |
| H  | -0.50785 | 5.91999 | 17.60355 |
| C  | 1.11500  | 4.53642 | 17.21034 |
| C  | 0.89012  | 4.59103 | 15.75581 |
| C  | -0.40985 | 4.87021 | 15.22961 |
| H  | -1.25082 | 4.99055 | 15.91813 |
| C  | -0.60911 | 4.94125 | 13.87760 |
| H  | -1.60874 | 5.14376 | 13.47162 |
| C  | 0.47338  | 4.72817 | 12.98702 |
| C  | 1.71202  | 4.43358 | 13.57337 |
| C  | 2.86348  | 4.17908 | 12.72734 |
| C  | 2.70648  | 4.22877 | 11.33699 |
| C  | 3.86021  | 3.93335 | 10.56683 |
| H  | 3.78585  | 3.90397 | 9.47191  |
| C  | 5.04527  | 3.65904 | 11.18905 |
| H  | 5.91863  | 3.38544 | 10.59274 |
| C  | 5.14740  | 3.67374 | 12.61963 |
| C  | 6.44645  | 3.42879 | 13.26630 |
| C  | 7.62304  | 3.62714 | 12.50156 |
| H  | 7.53905  | 4.05022 | 11.49375 |
| C  | 8.88551  | 3.36297 | 12.98935 |
| H  | 9.77005  | 3.55197 | 12.37183 |
| C  | 9.01078  | 2.85361 | 14.29562 |
| H  | 10.00286 | 2.61377 | 14.69943 |
| C  | 7.89504  | 2.67187 | 15.07946 |
| H  | 7.96575  | 2.29469 | 16.10603 |
| C  | 6.58001  | 2.98961 | 14.62474 |

|   |          |         |          |
|---|----------|---------|----------|
| C | 0.34898  | 4.77549 | 11.55791 |
| H | -0.63049 | 5.00890 | 11.12304 |
| C | 1.42566  | 4.53169 | 10.76346 |
| H | 1.33419  | 4.55581 | 9.67058  |
| O | 4.47588  | 5.52865 | 16.35852 |
| H | 5.26727  | 5.27224 | 16.85926 |
| H | 3.80623  | 5.76167 | 17.02306 |

**Zn-OH<sup>-</sup>**

Energy: -3037.5944552

|    |          |         |          |
|----|----------|---------|----------|
| Zn | 4.02646  | 4.05340 | 15.63588 |
| N  | 1.90732  | 4.37159 | 14.94898 |
| N  | 4.05274  | 3.93118 | 13.36222 |
| O  | 3.05512  | 3.06667 | 17.11731 |
| O  | 5.49118  | 2.68156 | 15.39359 |
| C  | 2.15626  | 3.67540 | 17.80197 |
| C  | 2.16009  | 3.55454 | 19.23220 |
| H  | 2.94892  | 2.91850 | 19.65156 |
| C  | 1.26661  | 4.22469 | 20.03686 |
| H  | 1.33957  | 4.12190 | 21.12886 |
| C  | 0.27834  | 5.05830 | 19.47689 |
| H  | -0.41108 | 5.62465 | 20.11324 |
| C  | 0.20777  | 5.15459 | 18.09918 |
| H  | -0.54782 | 5.81812 | 17.65812 |
| C  | 1.09829  | 4.47669 | 17.24044 |
| C  | 0.89246  | 4.56609 | 15.78786 |
| C  | -0.41244 | 4.83440 | 15.26019 |
| H  | -1.25757 | 4.93094 | 15.94787 |
| C  | -0.60967 | 4.92306 | 13.90963 |
| H  | -1.60911 | 5.12276 | 13.49956 |
| C  | 0.47802  | 4.72632 | 13.02366 |
| C  | 1.72017  | 4.44073 | 13.61543 |
| C  | 2.87464  | 4.19923 | 12.76067 |
| C  | 2.71040  | 4.24923 | 11.36598 |
| C  | 3.85757  | 3.95809 | 10.58816 |
| H  | 3.77686  | 3.94187 | 9.49251  |
| C  | 5.04207  | 3.66746 | 11.20619 |
| H  | 5.91606  | 3.38540 | 10.61187 |
| C  | 5.14078  | 3.68140 | 12.63622 |
| C  | 6.42906  | 3.40014 | 13.28758 |
| C  | 7.62060  | 3.61207 | 12.56106 |
| H  | 7.55861  | 4.06927 | 11.56444 |
| C  | 8.87181  | 3.31715 | 13.06976 |
| H  | 9.77556  | 3.52389 | 12.48427 |
| C  | 8.95310  | 2.76714 | 14.36455 |
| H  | 9.93522  | 2.52528 | 14.79475 |
| C  | 7.81549  | 2.55185 | 15.10799 |
| H  | 7.86013  | 2.14571 | 16.12559 |
| C  | 6.50188  | 2.88075 | 14.62988 |
| C  | 0.35249  | 4.78529 | 11.59456 |
| H  | -0.62992 | 5.01891 | 11.16400 |



|   |         |         |          |
|---|---------|---------|----------|
| C | 1.42789 | 4.55234 | 10.79566 |
| H | 1.33625 | 4.58639 | 9.70224  |
| O | 4.56569 | 5.81286 | 16.02977 |
| H | 5.17444 | 5.83309 | 16.77800 |

**Zn-HCO<sub>3</sub><sup>-</sup> (single Zn-O')**

Energy: -3226.1664909

|    |          |         |          |
|----|----------|---------|----------|
| C  | 6.53499  | 2.73952 | 14.67419 |
| C  | 6.47536  | 3.30553 | 13.35277 |
| C  | 7.67557  | 3.50787 | 12.63674 |
| C  | 8.91375  | 3.13659 | 13.12665 |
| C  | 8.97283  | 2.51295 | 14.38773 |
| C  | 7.82843  | 2.31914 | 15.12745 |
| C  | 5.19604  | 3.64212 | 12.70438 |
| C  | 5.11158  | 3.70295 | 11.27564 |
| C  | 3.93642  | 4.04003 | 10.66400 |
| C  | 2.78774  | 4.31505 | 11.44479 |
| C  | 2.93686  | 4.20336 | 12.83516 |
| N  | 4.10374  | 3.87155 | 13.42879 |
| C  | 1.78585  | 4.44431 | 13.69065 |
| C  | 0.55816  | 4.78343 | 13.10307 |
| C  | 0.44224  | 4.89592 | 11.67635 |
| C  | 1.51771  | 4.67073 | 10.87700 |
| C  | -0.52948 | 4.98338 | 13.98732 |
| C  | -0.34591 | 4.85232 | 15.33556 |
| C  | 0.94459  | 4.52591 | 15.86356 |
| N  | 1.95542  | 4.31746 | 15.02382 |
| Zn | 4.01671  | 3.86348 | 15.63123 |
| O  | 4.72062  | 5.64548 | 16.11218 |
| C  | 4.39048  | 6.65884 | 15.38077 |
| O  | 4.95263  | 7.83303 | 15.82604 |
| C  | 1.13732  | 4.39697 | 17.31852 |
| C  | 2.19448  | 3.59724 | 17.87771 |
| C  | 2.18137  | 3.43123 | 19.30124 |
| C  | 1.26373  | 4.05989 | 20.11242 |
| C  | 0.27601  | 4.89874 | 19.56115 |
| C  | 0.22861  | 5.04057 | 18.18652 |
| O  | 3.11768  | 3.01596 | 17.19413 |
| O  | 5.52236  | 2.56800 | 15.44913 |
| O  | 3.67395  | 6.68663 | 14.39186 |
| H  | 2.97279  | 2.79194 | 19.71064 |
| H  | 1.31607  | 3.91749 | 21.20110 |
| H  | -0.43407 | 5.43343 | 20.20227 |
| H  | -0.52609 | 5.71254 | 17.75820 |
| H  | -1.19302 | 4.96362 | 16.01772 |
| H  | -1.51911 | 5.22776 | 13.57773 |
| H  | 3.86704  | 4.08448 | 9.56844  |
| H  | 5.98778  | 3.44496 | 10.67465 |
| H  | 7.63231  | 4.01634 | 11.66535 |
| H  | 9.82424  | 3.33187 | 12.54887 |
| H  | 9.94202  | 2.19264 | 14.79541 |

|   |          |         |          |
|---|----------|---------|----------|
| H | 7.85403  | 1.85723 | 16.12114 |
| H | -0.53207 | 5.16713 | 11.24970 |
| H | 1.43787  | 4.75577 | 9.78529  |
| H | 5.46903  | 7.56729 | 16.60022 |

**Zn-HCO<sub>3</sub><sup>-</sup> (double Zn-O')**

Energy: -3226.1577024

|    |          |          |          |
|----|----------|----------|----------|
| C  | -4.61913 | 0.73110  | -0.21551 |
| C  | -3.30518 | 0.50580  | 0.24593  |
| C  | -2.64646 | 1.50549  | 1.05306  |
| C  | -3.44432 | 2.64634  | 1.40685  |
| C  | -4.72763 | 2.82596  | 0.94452  |
| C  | -5.33465 | 1.86995  | 0.10343  |
| C  | -2.65923 | -0.78655 | -0.00638 |
| C  | -3.44408 | -1.96621 | -0.21615 |
| C  | -2.83786 | -3.18546 | -0.34142 |
| C  | -1.42854 | -3.29148 | -0.23015 |
| C  | -0.72399 | -2.09129 | -0.03612 |
| N  | -1.33127 | -0.88917 | 0.03399  |
| C  | -0.72872 | -4.54341 | -0.27511 |
| C  | 0.62021  | -4.58395 | -0.11024 |
| C  | 1.36760  | -3.37742 | 0.10292  |
| C  | 0.72255  | -2.12924 | 0.13287  |
| N  | 1.37026  | -0.95799 | 0.32150  |
| C  | 2.69730  | -0.93134 | 0.43474  |
| C  | 3.41424  | -2.17393 | 0.49458  |
| C  | 2.76508  | -3.36381 | 0.32645  |
| C  | 3.43610  | 0.34409  | 0.50284  |
| C  | 2.79559  | 1.60752  | 0.76227  |
| C  | 3.65715  | 2.74903  | 0.89242  |
| C  | 5.01748  | 2.68201  | 0.70873  |
| C  | 5.62973  | 1.45573  | 0.38341  |
| C  | 4.83513  | 0.32954  | 0.29128  |
| O  | 1.53392  | 1.79121  | 0.90511  |
| Zn | -0.01134 | 0.87001  | 0.09266  |
| O  | 0.60603  | 0.42339  | -2.02439 |
| C  | -0.20991 | 1.32722  | -2.26281 |
| O  | -0.46325 | 1.69588  | -3.54449 |
| O  | -1.43904 | 1.42000  | 1.47244  |
| O  | -0.84476 | 1.93865  | -1.34403 |
| H  | -2.95124 | 3.39240  | 2.04168  |
| H  | -5.27954 | 3.73503  | 1.22313  |
| H  | -6.34522 | 2.02534  | -0.29148 |
| H  | -5.08025 | -0.01100 | -0.88176 |
| H  | -4.53517 | -1.88795 | -0.22996 |
| H  | -3.43458 | -4.09543 | -0.49324 |
| H  | 3.31496  | -4.31393 | 0.37042  |
| H  | 4.48627  | -2.17279 | 0.70309  |
| H  | 5.32119  | -0.60882 | 0.00118  |
| H  | 6.70744  | 1.39303  | 0.19427  |
| H  | 5.62471  | 3.59341  | 0.80095  |

|   |          |          |          |
|---|----------|----------|----------|
| H | 3.15157  | 3.69394  | 1.12468  |
| H | -1.30646 | -5.46301 | -0.43567 |
| H | 1.16321  | -5.53789 | -0.13300 |
| H | -1.12674 | 2.39738  | -3.46632 |

**Zn-OH-□□□CO<sub>2</sub> TS**

Energy: -3226.1401996

|    |          |          |          |
|----|----------|----------|----------|
| C  | 2.73754  | -1.81307 | -0.74538 |
| C  | 3.37364  | -0.60041 | -0.29971 |
| C  | 4.71055  | -0.64608 | 0.15112  |
| C  | 5.46446  | -1.80480 | 0.14586  |
| C  | 4.87400  | -2.98260 | -0.35342 |
| C  | 3.56735  | -2.98288 | -0.78598 |
| C  | 2.68740  | 0.70087  | -0.35772 |
| C  | 3.45166  | 1.90788  | -0.46332 |
| C  | 2.82667  | 3.12337  | -0.51102 |
| C  | 1.41323  | 3.19094  | -0.47553 |
| C  | 0.73208  | 1.96554  | -0.40243 |
| N  | 1.35805  | 0.77080  | -0.34315 |
| C  | -0.72278 | 1.96572  | -0.39751 |
| C  | -1.40692 | 3.18957  | -0.45989 |
| C  | -0.67724 | 4.42488  | -0.51968 |
| C  | 0.68168  | 4.42551  | -0.52932 |
| C  | -2.82103 | 3.11984  | -0.47884 |
| C  | -3.44374 | 1.90324  | -0.43735 |
| C  | -2.67570 | 0.69698  | -0.35278 |
| N  | -1.34674 | 0.77086  | -0.34104 |
| Zn | 0.00108  | -0.99241 | -0.15548 |
| O  | 1.51273  | -1.90463 | -1.12060 |
| C  | -3.35464 | -0.60809 | -0.31755 |
| C  | -2.71211 | -1.80413 | -0.79672 |
| C  | -3.53145 | -2.97923 | -0.86027 |
| C  | -4.83455 | -3.00024 | -0.41749 |
| C  | -5.43139 | -1.83949 | 0.11229  |
| C  | -4.68790 | -0.67378 | 0.13978  |
| O  | -1.48859 | -1.87470 | -1.18368 |
| O  | -0.03502 | -1.32132 | 1.72739  |
| C  | -0.06492 | 0.24255  | 3.18201  |
| O  | -0.05927 | 1.15526  | 2.44154  |
| O  | -0.07590 | -0.37696 | 4.17975  |
| H  | -3.04259 | -3.87688 | -1.25718 |
| H  | -5.40598 | -3.93794 | -0.46379 |
| H  | -6.45642 | -1.85721 | 0.49964  |
| H  | -5.14403 | 0.22654  | 0.57227  |
| H  | -4.53367 | 1.84033  | -0.49994 |
| H  | -3.40497 | 4.04782  | -0.54913 |
| H  | 3.40888  | 4.05126  | -0.59736 |
| H  | 4.54051  | 1.84689  | -0.54378 |
| H  | 5.16164  | 0.26849  | 0.55771  |
| H  | 6.49273  | -1.80481 | 0.52483  |
| H  | 5.45501  | -3.91474 | -0.38361 |

|   |          |          |          |
|---|----------|----------|----------|
| H | 3.08674  | -3.89194 | -1.16730 |
| H | -1.24111 | 5.36595  | -0.55439 |
| H | 1.24447  | 5.36731  | -0.57390 |
| H | 0.07427  | -2.21651 | 2.06584  |

## References

- (1) Orejón, A.; Castellanos, A.; Salagre, P.; Castellón, S.; Claver, C. *Can. J. Chem.* **2005**, *83*, 764–768.
- (2) M11-L: A Local Density Functional That Provides Improved Accuracy for Electronic Structure Calculations in Chemistry and Physics, Roberto Peverati and Donald G. Truhlar, *The Journal of Physical Chemistry Letters* 2012 *3* (1), 117-124
- (3) General Atomic and Molecular Electronic Structure System, M.W.Schmidt, K.K.Baldrige, J.A.Boatz, S.T.Elbert, M.S.Gordon, J.H.Jensen, S.Koseki, N.Matsunaga, K.A.Nguyen, S.Su, T.L.Windus, M.Dupuis, J.A.Montgomery *J. Comput. Chem.*, *14*, 1347-1363(1993).
- (4) Ugo Varetto, <MOLEKEL 4.3>; Swiss National Supercomputing Centre: Lugano (Switzerland)
